# Supplementary material for: Phylogenetic Reconstructions Reveal the Co-circulation of Different Lineages of Dengue Virus 2 in the Northern Region of Brazil: Insights into the Persistence of the Asian-American Genotype and the Introduction of the Cosmopolitan Genotype
Source: Preprints.org preprint supplement (doi:10.20944/preprints202311.0566.v1), 2023-11-08
Supplement: Supplementary file 1 [file Supplementary Table 1 List of selected samples in the study..xlsx]

## Sheet: Planilha1
#	Result	FU	ID	CD	Serotype	Sample
1	Positive	TO	OR609396	2017-10-28	Dengue 2	Serum
2	Positive	RO	OR609397	2019-07-26	Dengue 2	Serum
3	Positive	RO	OR609398	2019-11-11	Dengue 2	Serum
4	Positive	RO	OR609399	2019-12-09	Dengue 2	Serum
5	Positive	RO	OR609400	2019-12-10	Dengue 2	Serum
6	Positive	RO	OR609411	2020-01-26	Dengue 2	Serum
7	Positive	RO	OR609404	2020-02-07	Dengue 2	Serum
8	Positive	RO	OR609405	2020-01-17	Dengue 2	Serum
9	Positive	RO	OR609406	2020-01-29	Dengue 2	Serum
10	Positive	RO	OR609407	2020-02-06	Dengue 2	Serum
11	Positive	RO	OR609408	2020-01-31	Dengue 2	Serum
12	Positive	RO	OR609412	2020-01-30	Dengue 2	Serum
13	Positive	RO	OR609403	2020-02-07	Dengue 2	Serum
14	Positive	RO	OR609410	2020-02-18	Dengue 2	Serum
15	Positive	RO	OR609413	2020-02-10	Dengue 2	Serum
16	Positive	RO	OR609414	2020-02-12	Dengue 2	Serum
17	Positive	RO	OR609415	2020-02-10	Dengue 2	Serum
18	Positive	RO	OR609417	2020-02-10	Dengue 2	Serum
19	Positive	RO	OR609409	2020-01-29	Dengue 2	Serum
20	Positive	RO	OR609416	2020-01-07	Dengue 2	Serum
21	Positive	AC	OR609401	2020-01-25	Dengue 2	Serum
22	Positive	AC	OR609402	2020-01-09	Dengue 2	Serum
23	Positive	AC	OR609421	2021-01-15	Dengue 2	Serum
24	Positive	AC	OR609418	2021-01-11	Dengue 2	Serum
25	Positive	AC	OR609419	2021-01-20	Dengue 2	Serum
26	Positive	AC	OR609420	2021-01-15	Dengue 2	Serum
27	Positive	AC	OR609422	2021-01-25	Dengue 2	Serum
28	Positive	AC	OQ511272	2021-02-24	Dengue 2	Serum
29	Positive	AC	OQ511275	2021-02-26	Dengue 2	Serum
30	Positive	AC	OQ511273	2021-03-10	Dengue 2	Serum
31	Positive	AC	OQ511271	2021-02-01	Dengue 2	Serum
32	Positive	AC	OQ511274	2021-02-27	Dengue 2	Serum
