# Supplementary material for: Phylogenetic Reconstructions Reveal the Co-circulation of Different Lineages of Dengue Virus 2 in the Northern Region of Brazil: Insights into the Persistence of the Asian-American Genotype and the Introduction of the Cosmopolitan Genotype
Source: Preprints.org preprint supplement (doi:10.20944/preprints202311.0566.v1), 2023-11-08
Supplement: Supplementary file 2 [file Supplementary Table List of sequences included in phylogenetic inference.xlsx]

## Sheet: Planilha1
Access Number	Country	Collection Date	Genotype	Lineage
OQ511273	Brazil	2021-03-10	Cosmopolitan	5
OM744143	Brazil	11/29/2021
OQ511271	Brazil	2021-02-01
OQ511274	Brazil	2021-02-27
OQ511272	Brazil	2021-02-24
OQ511275	Brazil	2021-02-26
OR609420	Brazil	2021-01-15
OR609419	Brazil	2021-01-20
OR609422	Brazil	2021-01-25
OR609418	Brazil	2021-01-11
OR609421	Brazil	2021-01-15
OM791800	Peru	2019
OM791801	Peru	2019
LC436672	Bangladesh	2017
MN328061	Bangladesh	2019
LC436673	Bangladesh	2017
LC436674	Bangladesh	2017
MW512387	Singapore	2013
LC410191	Thailand	2017
KU517847	Philippines	2015
KX372564	Australia	2015
KX452040	Malaysia	2014
MK564480	China	2016
MH110588	China	2017
MW512491	Singapore	2019
MK513444	Singapore	2015
EU179857	Brunei	2005
KC762669	Indonesia	2007
HM488257	Guam	2001
KX380830	Singapore	2013
KX380819	Singapore	2012		4
KX380809	Singapore	2012
KY921904	Singapore	2014
MW512379	Singapore	2012
KX380836	Singapore	2013
KU517846	Indonesia	2014
MW512466	Singapore	2016
AY858036	Indonesia	2004
MK578532	China	2016
MW512354	Singapore	2009
KM279597	Singapore	2012		2
JN851113	Singapore	2006
KM279604	Singapore	2008
KU509272	Thailand	2009
KC762660	Indonésia	2007
KX452015	Malásia	2014
KC762678	Indonésia	2010
MW512414	Singapore	2014
KU517845	Papua New Guinea	2013
MH985858	Australia	2016
KC762658	Indonesia	2007
EU081177	Singapore	2005
EU081180	Singapore	2005		-
JN851124	Singapore	2005		-
KC762672	Indonesia	2008		-
KC762680	Indonesia	2010		3
JX470186	China	2010
EU482640	Vietnam	2006
EU179859	Brunei	2006
MW512376	Singapore	2012
KT187557	China	2014
MG189962	Tanzania	2014
AY858035	Indonesia	2004
KU365902	Taiwan	2015
MW512450	Singapore	2016
MF004385	France	2014
AY037116	Australia	1993
KC964094	China	1993		-
EF051521	China	2001		-
KU509274	Philippines	2010		1
KF744397	Philippines	2001
MW512489	Singapore	2018
DQ645553	Taiwan	2002
DQ645554	Taiwan	2002
KF744398	Filipinas	2005
JN851131	Singapore	2005
MW512409	Singapore	2013
AB189122	Indonesia	1998
GQ398264	Indonesia	1976
EU056810	Burkina Faso	1983		-
GU131843	Burkina Faso	1986		-
GQ398262	Indonesia	1976		-
KJ830750	Saudi Arabia	2014		-
KJ010186	Pakistan	2013		Indian Sub-continent
GQ252677	Sri Lanka	2003
MF156247	China	2015
MH110592	China	2017
MH822948	India	2012
JQ955623	India	2009
MW512372	Singapore	2012
MW512490	Singapore	2019
MG779194	Kenya	2017
KY672948	China	2013
KY849763	Laos	2010	Asian I	-
DQ181797	Thailand	2001		-
GU131897	Camboja	2007		-
FM210211	Vietnam	2003		-
DQ181798	Thailand	1999		-
GQ868545	Thailand	1996		-
DQ181802	Thailand	1988		-
DQ181805	Thailand	1979		-
AJ487271	Thailand	1974		-
NC_001474	Thailand	1964		-
HQ891023	Taiwan	2008		-
HQ891024	Taiwan	2008	Asian II	-
AF204177	China	1989		-
AF038403	Papua New Guinea	1944		-
FJ906959	Papua New Guinea	2008		-
KF704358	Cuba	1981		-
KF744400	Philippines	2000		-
KF744407	Philippines	1996		-
KJ734727	Taiwan	2014		-
EU482600	Nicaragua	2005		-
OR609399	Brazil	2019-12-09	Asian-American	-
OR609415	Brazil	2020-02-10		-
OR609400	Brazil	2019-12-10		-
OR609413	Brazil	2020-02-10		-
OR609416	Brazil	2020-02-10		-
OR609406	Brazil	2020-01-29		-
OR609410	Brazil	2020-02-18		-
OR609414	Brazil	2020-02-12		-
OR609403	Brazil	2020-02-07		-
OR609401	Brazil	2020-01-25		-
OR609402	Brazil	2020-01-09		-
OR609409	Brazil	2020-01-29		-
OR609398	Brazil	2019-11-11		-
OR609405	Brazil	2020-01-17		-
OR609407	Brazil	2020-02-06		-
OR609417	Brazil	2020-02-10		-
OR609397	Brazil	2019-07-26		-
OR609408	Brazil	2020-01-31		-
OR609412	Brazil	2020-01-30		-
OR609411	Brazil	2020-01-26		-
OR609404	Brazil	2020-02-07		-
OR609396	Brazil	2017-10-28		-
GQ199868	Nicaragua	2007		-
FJ898461	Belize	2002		-
AY702036	Cuba	1997		-
EU687217	Puerto Rico	2005		-
GQ868596	Venezuela	1991		-
JX669488	Brasil	2002		-
GQ868540	Venezuela	1990		-
EU569704	Puerto Rico	1986		-
GQ398290	Puerto Rico	1994		-
JN819418	Vietnam	1988		-
AF119661	China	1985		-
DQ181801	Thailand	1990		-
AF100469	México	1992		-
GQ868589	México	1983	American	-
EU056811	Peru	1995		-
GQ868592	Colombia	1986		-
HM582107	American Samoa	1972		-
HM582110	French Polynesia	1973		-
HM582117	Tonga	1974		-
EU056812	Puerto Rico	1977		-
GQ398257	Indonesia	1977		-
